# Supplementary material for: Involvement of miR-770-5p in trastuzumab response in HER2 positive breast cancer cells
Source: PubMed Central journal article supplement (PMC6476517; doi:10.1371/journal.pone.0215894), 2019-04-22

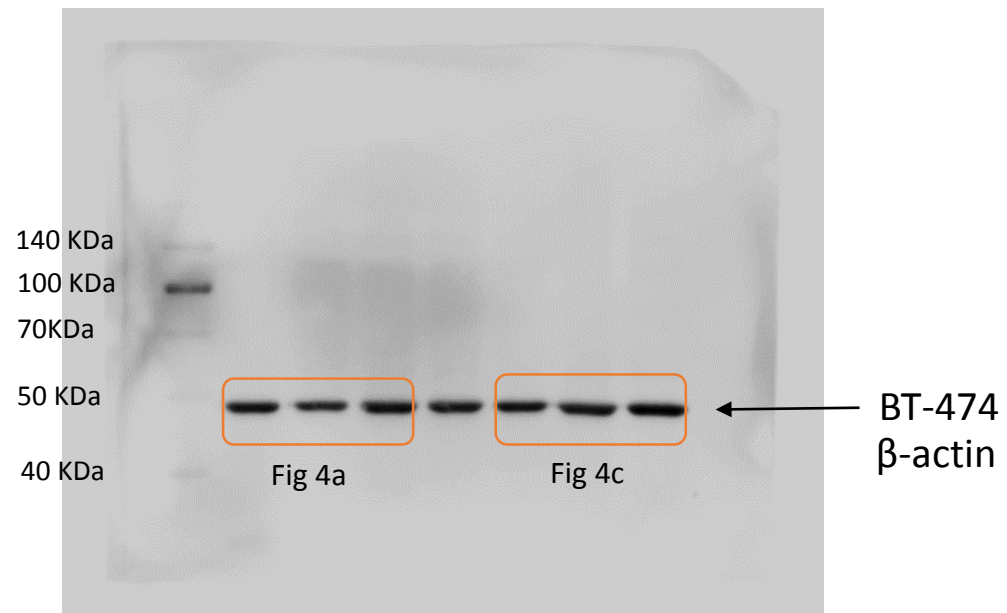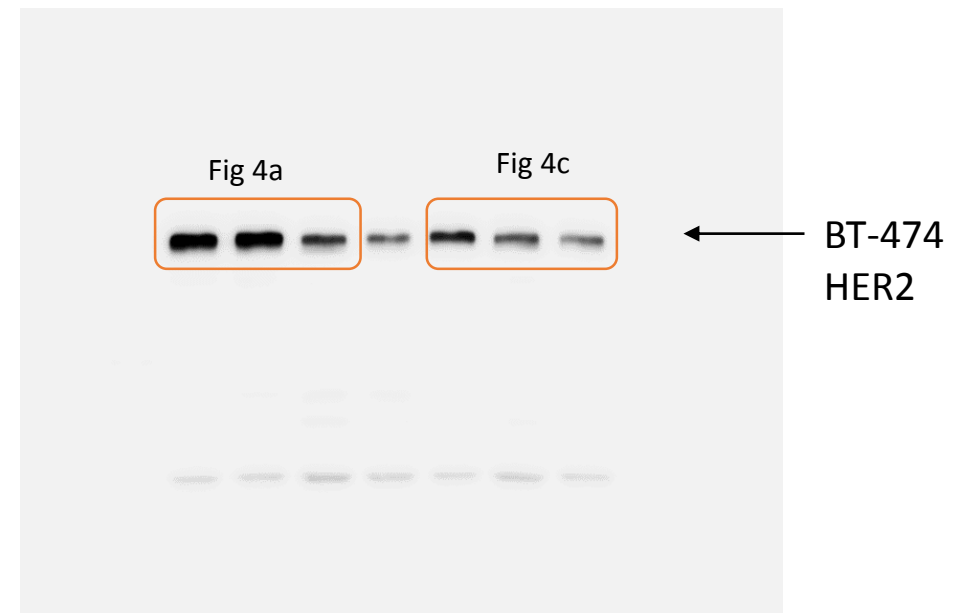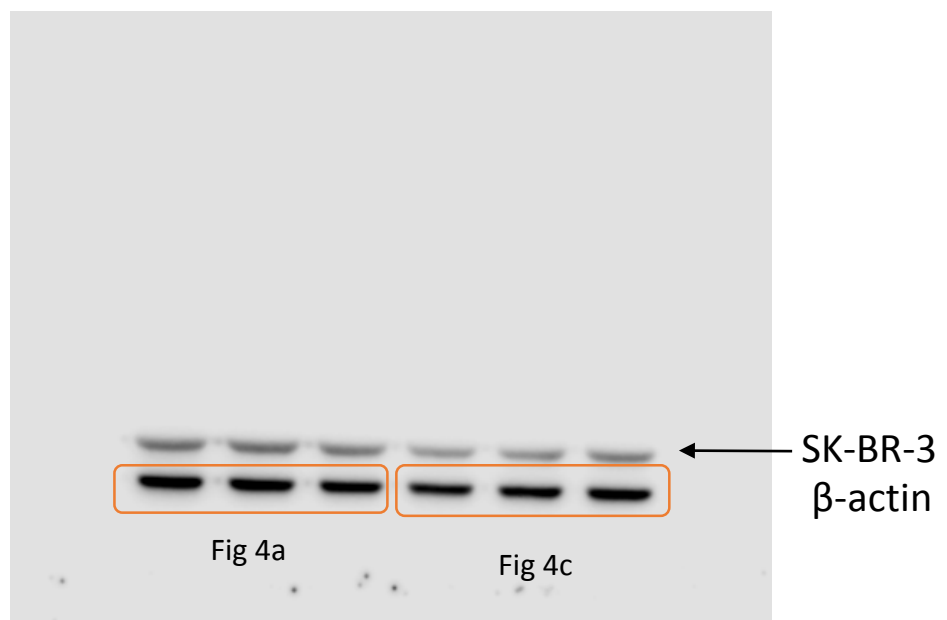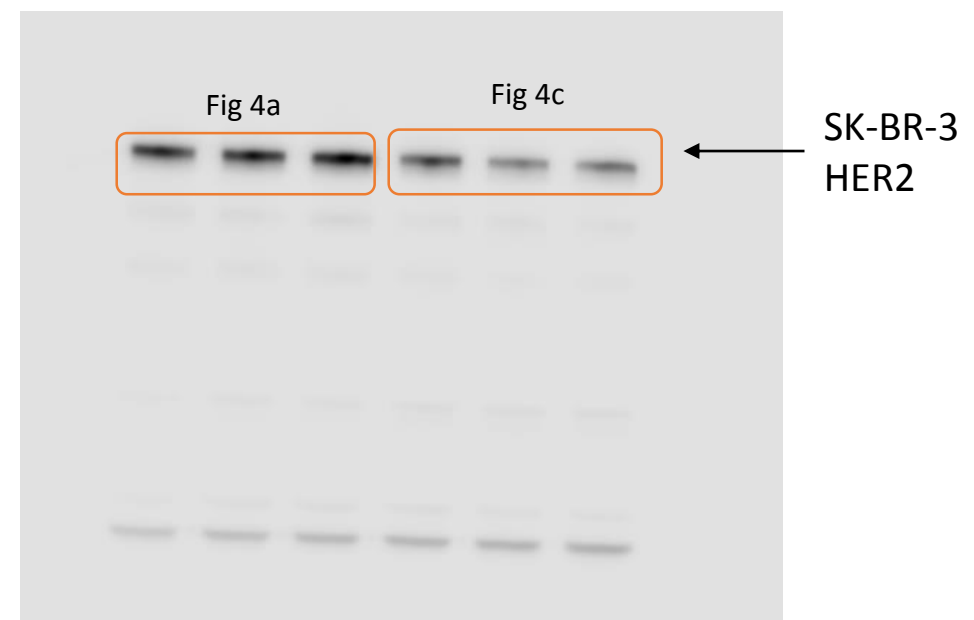

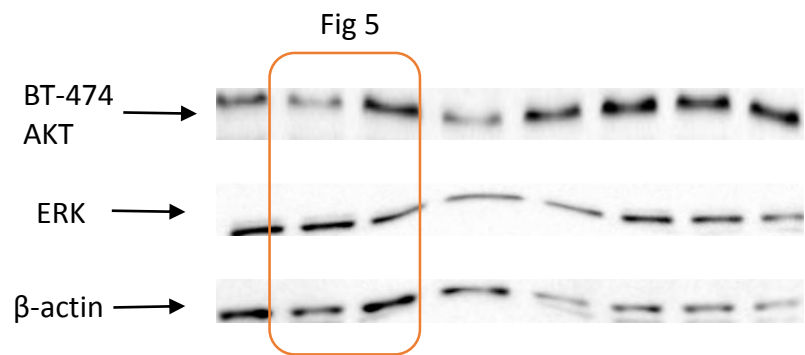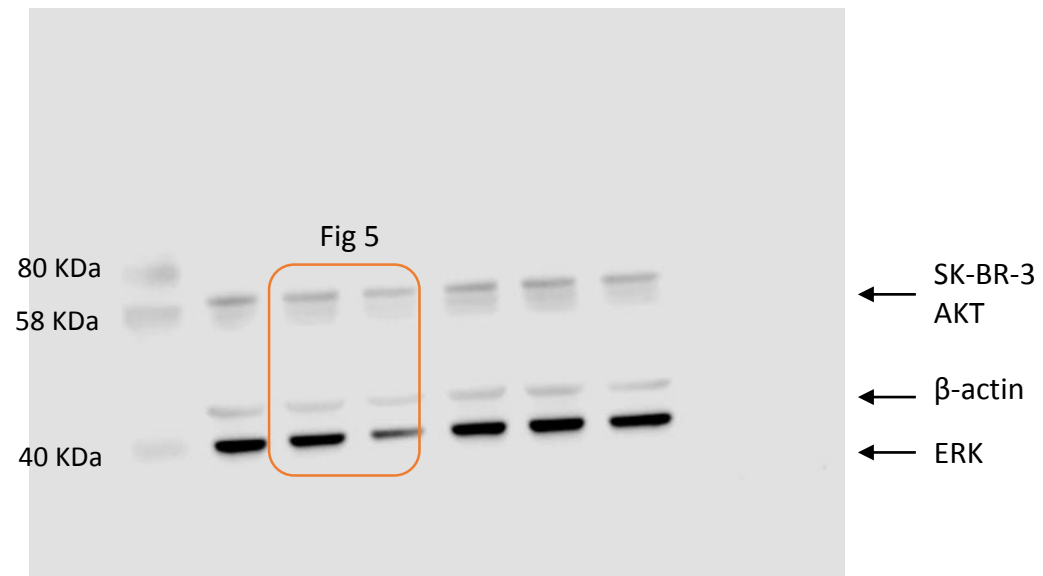

Fig 6

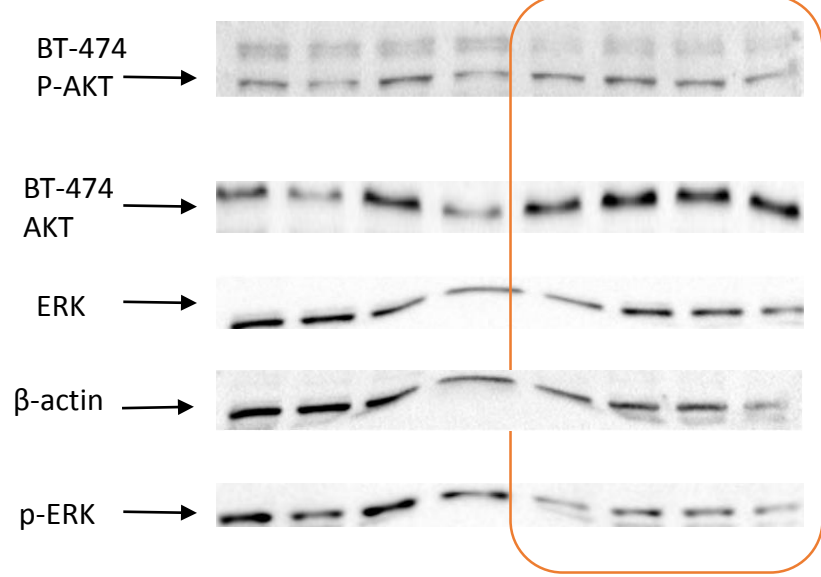

Supplement: pone.0215894.s004.pdf [file pone.0215894.s004.pdf]
